# Supplementary material for: The Most-Cited Articles on Retinoblastoma: A Fifty-Year Perspective
Source: MDPI journal article supplement (doi:10.3390/vision7020033), 2023-04-04
Supplement: s1 [file s1]

Table S1. The 100 most frequently cited papers on Retinoblastoma in descending order.

| Article Position | No. of Citations | Author's First Name | Author's Last Name | Journal Name                                    | Publication Year | Original Title                                                                                             |
|------------------|------------------|---------------------|--------------------|-------------------------------------------------|------------------|------------------------------------------------------------------------------------------------------------|
| 1                | 462              | Draper              | Kingston           | British journal of cancer                       | 1986             | Second Primary Neoplasms in Patients with Retinoblastoma                                                   |
| 2                | 457              | Wong                | Frederick          | JAMA                                            | 1997             | Cancer incidence after retinoblastoma - Radiation dose and sarcoma risk                                    |
| 3                | 455              | Yunis               | Ramsay             | American journal of diseases of children        | 1978             | Retinoblastoma and Subband Deletion of Chromosome 13                                                       |
| 4                | 407              | Kivela              |                    | British Journal of Ophthalmology                | 2009             | The Epidemiological Challenge of the Most Frequent Eye Cancer: Retinoblastoma, an Issue of Birth and Death |
| 5                | 380              | Abramson            | Tung               | Ophthalmology                                   | 1984             | Second Nonocular Tumors in Retinoblastoma Survivors: Are They Radiation-induced?                           |
| 6                | 360              | Murphree            |                    | Ophthalmology clinics of North America          | 2005             | Intraocular Retinoblastoma: The Case for a New Group Classification                                        |
| 7                | 358              | Shields             | Shields            | Ophthalmology                                   | 2006             | The International Classification of Retinoblastoma Predicts Chemoreduction Success                         |
| 8                | 333              | Murphree            | Gomer              | JAMA ophthalmology                              | 1996             | Chemotherapy plus local treatment in the management of intraocular retinoblastoma                          |
| 9                | 309              | Marees              | Moll               | European Journal of Cancer                      | 2009             | Cancer Mortality in Long-term Survivors of Retinoblastoma                                                  |
| 10               | 302              | Knudson Jr          | Brown              | Proceedings of the National Academy of Sciences | 1975             | Mutation and Childhood Cancer - Probabilistic Model for Incidence of Retinoblastoma                        |
| 11               | 276              | Knudson Jr          | Hill               | New England Journal of Medicine                 | 1976             | Chromosomal Deletion and Retinoblastoma                                                                    |
| 12               | 266              | Shields             | Maris              | JAMA ophthalmology                              | 1996             | Chemoreduction in the Initial Management of Intraocular Retinoblastoma                                     |
| 13               | 250              | Tombran-Tink        | Johnson            |                                                 | 1989             | Neuronal Differentiation of Retinoblastoma Cells Induced by Medium Conditioned by Human Rope Cells         |

| Investigative<br>ophthalmology &<br>visual science |     |                       |         |                                                                                                                        |      |                                                                                                                                                                                                                                                                                          |
|----------------------------------------------------|-----|-----------------------|---------|------------------------------------------------------------------------------------------------------------------------|------|------------------------------------------------------------------------------------------------------------------------------------------------------------------------------------------------------------------------------------------------------------------------------------------|
| 14                                                 | 213 | Kingston              | Plowman | JAMA<br>ophthalmology                                                                                                  | 1996 |                                                                                                                                                                                                                                                                                          |
| 15                                                 | 208 | Broadus               | Singh   | British Journal of<br>Ophthalmology                                                                                    | 2009 | Results of Combined Chemotherapy<br>and Radiotherapy for Advanced<br>Intraocular Retinoblastoma                                                                                                                                                                                          |
| 16                                                 | 208 | Abramson              | Frank   | Ophthalmology                                                                                                          | 1998 | Incidence of Retinoblastoma in the<br>USA: 1975-2004                                                                                                                                                                                                                                     |
| 17                                                 | 208 | Zampetti-<br>Bosseler | Scott   | International<br>Journal of<br>Radiation<br>Biology and<br>Related Studies<br>in Physics,<br>Chemistry and<br>Medicine | 1981 | Second Nonocular Tumors in<br>Survivors of Bilateral<br>Retinoblastoma - a Possible Age<br>Effect on Radiation-related Risk<br><br>Cell-death, Chromosome-damage<br>and Mitotic Delay in Normal<br>Human, Ataxia Telangiectasia and<br>Retinoblastoma Fibroblasts After<br>X-irradiation |
| 18                                                 | 197 | Jensen                | Miller  | New England<br>Journal of<br>Medicine                                                                                  | 1971 |                                                                                                                                                                                                                                                                                          |
| 19                                                 | 194 | Shields               | Shields | Current opinion<br>in ophthalmology                                                                                    | 2010 | Retinoblastoma - Epidemiologic<br>Characteristics                                                                                                                                                                                                                                        |
| 20                                                 | 192 | Knudson Jr            |         | Seminars in<br>oncology<br>Journal of<br>Clinical                                                                      | 1978 | Retinoblastoma Management:<br>Advances in Enucleation,<br>Intravenous Chemoreduction, and<br>Intra-arterial Chemotherapy                                                                                                                                                                 |
| 21                                                 | 191 | Friedman              | Meadows | Oncology                                                                                                               | 2000 | Retinoblastoma- prototypic<br>hereditary neoplasm                                                                                                                                                                                                                                        |
| 22                                                 | 187 | McFall                | Makadon | Cancer research                                                                                                        | 1977 | Chemoreduction and Local<br>Ophthalmic Therapy for Intraocular<br>Retinoblastoma                                                                                                                                                                                                         |
| 23                                                 | 185 | Yamane                | Mohri   | International<br>journal of clinical<br>oncology                                                                       | 2004 | Characterization of a New<br>Continuous Cell Line Derived from<br>a Human Retinoblastoma                                                                                                                                                                                                 |
| 24                                                 | 179 | Khelfaoui             | Vielh   | Cancer                                                                                                                 | 1996 | The Technique of Ophthalmic<br>Arterial Infusion Therapy for<br>Patients with Intraocular<br>Retinoblastoma                                                                                                                                                                              |
| 25                                                 | 173 | Lee                   | Smith   | International<br>Journal of<br>Radiation<br>Oncology<br>Biology Physics                                                | 2005 | Histopathologic Risk Factors in<br>Retinoblastoma - a Retrospective<br>Study of 172 Patients Treated in a<br>Single Institute                                                                                                                                                            |
| 26                                                 | 170 | Simpson               | Dendale | Brachytherapy                                                                                                          | 2014 | Treatment Planning with Protons for<br>Pediatric Retinoblastoma,<br>Medulloblastoma, and Pelvic Sarcoma<br><br>The American Brachytherapy Society<br>Consensus Guidelines for<br>Plaque Brachytherapy of Uveal<br>Melanoma and Retinoblastoma                                            |

---

|    |     |               |                |                                             |      |                                                                                                                                               |
|----|-----|---------------|----------------|---------------------------------------------|------|-----------------------------------------------------------------------------------------------------------------------------------------------|
| 27 | 169 | Shields       | De-Potter      | Cancer                                      | 1994 | Optic-nerve Invasion of Retinoblastoma - Metastatic Potential and Clinical Risk Factors                                                       |
| 28 | 164 | Honavar       | Shields        | JAMA ophthalmology                          | 2002 | Postenucleation Adjuvant Therapy in High-risk Retinoblastoma                                                                                  |
| 29 | 160 | Shields       | De-Potter      | British journal of ophthalmology            | 1993 | Choroidal Invasion of Retinoblastoma - Metastatic Potential and Clinical Risk Factors                                                         |
| 30 | 158 | Shields       | Naduvilath     | American journal of ophthalmology           | 2002 | Chemoreduction Plus Focal Therapy for Retinoblastoma: Factors Predictive of Need for Treatment with External Beam Radiotherapy or Enucleation |
| 31 | 150 | Kivelä        | Kivelä, Tero   | Journal of Clinical Oncology                | 1999 | Trilateral Retinoblastoma: A Meta-analysis of Hereditary Retinoblastoma Associated with Primary Ectopic Intracranial Retinoblastoma           |
| 32 | 146 | Abramson      | Dunkel         | Ophthalmology                               | 1999 | A Phase I/II Study of Subconjunctival Carboplatin for Intraocular Retinoblastoma                                                              |
| 33 | 146 | Kopelman      | Rosenberg      | Ophthalmology                               | 1987 | Multivariate-analysis of Risk-factors for Metastasis in Retinoblastoma Treated by Enucleation                                                 |
| 34 | 142 | Chintagumpala | Hurwitz        | The Oncologist                              | 2007 | Retinoblastoma: Review of Current Management                                                                                                  |
| 35 | 141 | Gombos        | Leal           | Ophthalmology                               | 2007 | Secondary Acute Myelogenous Leukemia in Patients with Retinoblastoma - Is Chemotherapy a Factor                                               |
| 36 | 141 | Abramson      | Boyd III       | The Journal of pediatrics                   | 1998 | Presenting Signs of Retinoblastoma                                                                                                            |
| 37 | 140 | Shields       | Shields        | Current opinion in ophthalmology            | 2006 | Basic Understanding of Current Classification and Management of                                                                               |
| 38 | 136 | Abramson      | Chantada       | JAMA ophthalmology                          | 2015 | Treatment of Retino Blastoma in 2015                                                                                                          |
| 39 | 135 | Chantada      | Schwarzman     | Pediatric blood & cancer                    | 2006 | Agreement and Disagreement A Proposal for an International Retinoblastoma Staging System                                                      |
| 40 | 133 | Shields       | Meadows        | Ophthalmology                               | 1997 | Combined Chemoreduction and Adjuvant Treatment for Intraocular Retinoblastoma                                                                 |
| 41 | 131 | Sastre        | Chevez-Barrios | Archives of pathology & laboratory medicine | 2009 | Proceedings of the Consensus Meetings from the International Retinoblastoma Staging Working                                                   |

---

|    |     |                   |                    |                                                 |      |                                                                                                                                                |
|----|-----|-------------------|--------------------|-------------------------------------------------|------|------------------------------------------------------------------------------------------------------------------------------------------------|
|    |     |                   |                    |                                                 |      | Group on the Pathology Guidelines for the Examination of Enucleated Eyes and Evaluation of Prognostic Risk Factors in Retinoblastoma           |
| 42 | 129 | Sanders           | Kingston           | British Journal of Ophthalmology                | 1988 | Retinoblastoma in Great-Britain 1969-80 - Incidence, Treatment, and Survival                                                                   |
| 43 | 126 | Lalande           | Latt               | Cancer                                          | 1984 | Isolation of Human-chromosome 13-specific DNA-Sequences Cloned From Flow Sorted Chromosomes and Potentially Linked to the Retinoblastoma Locus |
| 44 | 124 | Tamboli           | Hrom               | JAMA ophthalmology                              | 1990 | The Incidence of Retinoblastoma in the United States - 1974 Through 1985                                                                       |
| 45 | 122 | Hethcote          | Knudson Jr         | Proceedings of the National Academy of Sciences | 1978 | Model for Incidence of Embryonal Cancers - Application to Retinoblastoma                                                                       |
| 46 | 121 | Broadus           | Singh              | British Journal of Ophthalmology                | 2009 | Survival with Retinoblastoma in the USA: 1975-2004                                                                                             |
| 47 | 121 | Draper            | Hawkins            | British journal of cancer                       | 1992 | Patterns of Risk of Hereditary Retinoblastoma and Applications to Genetic- Counseling                                                          |
| 48 | 119 | Canturk           | Rodriguez -Galindo | British Journal of Ophthalmology                | 2010 | Survival of Retinoblastoma in Less-developed Countries Impact of Socioeconomic and Health- Related Indicators                                  |
| 49 | 118 | Ts'O              | Zimmerman          | American journal of ophthalmology               | 1970 | The Nature of Retinoblastoma. II. Photoreceptor Differentiation: an Electron Microscopic Study.                                                |
| 50 | 118 | Abramson          | Zimmerman          | Ophthalmology                                   | 1976 | Non-ocular Cancer in Retinoblastoma Survivors                                                                                                  |
| 51 | 116 | Rodriguez-Galindo | Kun                | Journal of Clinical Oncology                    | 2003 | Treatment of Intraocular Retinoblastoma with Vincristine and Carboplatin                                                                       |
| 52 | 115 | Moll              | Boers              | Ophthalmology                                   | 2001 | Second Primary Tumors in Hereditary Retinoblastoma: a Register-based Study, 1945-1997 - Is There an Age Effect on Radiation-related Risk?      |
| 53 | 114 | Shields           | Shields            | JAMA ophthalmology                              | 2011 | Intra-arterial Chemotherapy for Retinoblastoma Report No. 2, Treatment Complications                                                           |
| 54 | 114 | Pendergrass       | Davis              | JAMA ophthalmology                              | 1980 | Incidence of Retinoblastoma in the United-States                                                                                               |

|    |     |          |             |                                                                       |      |                                                                                                                                      |
|----|-----|----------|-------------|-----------------------------------------------------------------------|------|--------------------------------------------------------------------------------------------------------------------------------------|
| 55 | 114 | Ts' O    | Fine        | American journal of ophthalmology                                     | 1970 | The Nature of Retinoblastoma. I. Photoreceptor Differentiation: a Clinical and Histopathologic Study.                                |
| 56 | 113 | Chantada | Schvartzman | Archives of disease in childhood                                      | 1999 | Late Diagnosis of Retinoblastoma in a Developing Country                                                                             |
| 57 | 112 | Shields  | Micaily     | Ophthalmology                                                         | 2001 | Plaque Radiotherapy for Retinoblastoma - Long-term Tumor Control and Treatment Complications in 208 Tumors                           |
| 58 | 111 | Kaliki   | Eagle Jr.   | Ophthalmology                                                         | 2013 | High-Risk Retinoblastoma Based on International Classification of Retinoblastoma: Analysis of 519 Enucleated Eyes                    |
| 59 | 111 | Abramson | Ranjithan   | Pediatrics                                                            | 2003 | Screening for Retinoblastoma: Presenting Signs as Prognosticators of Patient and Ocular Survival                                     |
| 60 | 110 | Abramson | Ellsworth   | American Journal of Ophthalmology                                     | 1979 | Second Tumors in Non-irradiated Bilateral Retinoblastoma                                                                             |
| 61 | 109 | Shields  | Shields     | Eye                                                                   | 2013 | Retinoblastoma Frontiers with Intravenous, Intra-arterial, Periocular, and Intravitreal chemotherapy                                 |
| 62 | 109 | Shields  | Naduvilath  | JAMA ophthalmology                                                    | 2002 | Factors Predictive of Recurrence of Retinal Tumors, Vitreous Seeds, and Subretinal Seeds Following Chemoreduction for Retinoblastoma |
| 63 | 109 | Messmer  | Sauerwein   | Ophthalmology                                                         | 1991 | Risk-Factors for Metastases in Patients with Retinoblastoma                                                                          |
| 64 | 108 | Moll     | Tan         | British Journal of Ophthalmology                                      | 1997 | Incidence and Survival of Retinoblastoma in the Netherlands: a Register Based Study 1862-1995                                        |
| 65 | 108 | Nagasawa | Little      | Mutation Research/Fundamental and Molecular Mechanisms of Mutagenesis | 1983 | Comparison of Kinetics of X-ray-induced Cell Killing in Normal, Ataxia Telangiectasia and Hereditary Retinoblastoma Fibroblasts      |
| 66 | 107 | Devesa   |             | American journal of ophthalmology                                     | 1975 | Incidence of Retinoblastoma                                                                                                          |
| 67 | 107 | Jakobiec | Danis       | Cancer                                                                | 1977 | Retinoblastoma and Intracranial Malignancy                                                                                           |
| 68 | 106 | Shields  | Shields     | Journal of Pediatric Ophthalmology & Strabismus                       | 1999 | Recent Developments in the Management of Retinoblastoma                                                                              |

|    |     |              |            |                                                 |      |                                                                                                                                                                  |
|----|-----|--------------|------------|-------------------------------------------------|------|------------------------------------------------------------------------------------------------------------------------------------------------------------------|
| 69 | 105 | Leander      | Haik       | Pediatric blood & cancer                        | 2007 | Impact of an Education Program on Late Diagnosis of Retinoblastoma in Honduras                                                                                   |
| 70 | 103 | Shields      | Shields    | JAMA ophthalmology                              | 1999 | Thermotherapy for Retinoblastoma                                                                                                                                 |
| 71 | 102 | Squire       | Phillips   | Human genetics                                  | 1985 | A Detailed Analysis of Chromosomal Changes in Heritable and Non-heritable Retinoblastoma                                                                         |
| 72 | 102 | Benedict     | Murphree   | Cancer genetics                                 | 1983 | Nonrandom Chromosomal Changes in Untreated Retinoblastomas                                                                                                       |
| 73 | 100 | de Graaf     | Brisse     | Pediatric radiology                             | 2012 | Guidelines for Imaging Retinoblastoma: Imaging Principles and MRI Standardization                                                                                |
| 74 | 100 | Eagle Jr     |            | Archives of pathology & laboratory medicine     | 2009 | High-risk Features and Tumor Differentiation in Retinoblastoma a Retrospective Histopathologic Study                                                             |
| 75 | 99  | Magrann      | Ellsworth  | Ophthalmology                                   | 1989 | Optic-nerve Involvement in Retinoblastoma Targeted Retinoblastoma Management: When to Use Intravenous, Intra-arterial, Periocular, and Intravitreal Chemotherapy |
| 76 | 96  | Shields      | Shields    | Current Opinion in Ophthalmology                | 2014 |                                                                                                                                                                  |
| 77 | 96  | Wilson       | Fujimoto   | American journal of human genetics              | 1973 | Retinoblastoma and D-chromosome Deletions                                                                                                                        |
| 78 | 95  | Lennox       | Sanders    | British Journal of Medicine                     | 1975 | Retinoblastoma - Study of Natural-history and Prognosis of 268 Cases                                                                                             |
| 79 | 94  | Abramson     |            | Investigative ophthalmology & visual science    | 2005 | Retinoblastoma in the 20th Century: Past Success and Future Challenges - The Weisenfeld Lecture                                                                  |
| 80 | 94  | Chantada     | Abramson   | British journal of ophthalmology                | 2004 | Retinoblastoma Patients with High Risk Ocular Pathological Features: Who Needs Adjuvant Therapy                                                                  |
| 81 | 93  | Abramson     | Gobin      | British journal of ophthalmology                | 2012 | Intra-arterial Chemotherapy for Retinoblastoma in Eyes with Vitreous and/or Subretinal Seeding: 2-year Results                                                   |
| 82 | 93  | Weichselbaum | Little     | Proceedings of the National Academy of Sciences | 1978 | X-ray Sensitivity of Diploid Fibroblasts from Patients with Hereditary or Sporadic Retinoblastoma                                                                |
| 83 | 92  | Shields      | Augsburger | Survey of ophthalmology                         | 1981 | Current Approaches to the Diagnosis and Management of Retinoblastoma                                                                                             |
| 84 | 91  | Beck         | Munier     | Journal of Clinical Oncology                    | 2000 | First-line Chemotherapy with Local Treatment Can Prevent External-beam Irradiation and Enucleation in Low-stage Intraocular Retinoblastoma                       |

|    |    |             |                   |                                          |      |                                                                                                                                                                                       |
|----|----|-------------|-------------------|------------------------------------------|------|---------------------------------------------------------------------------------------------------------------------------------------------------------------------------------------|
| 85 | 91 | Bedford     | Macfaul           | The British journal of ophthalmology     | 1971 | Retinoblastoma - Study of 139 Cases                                                                                                                                                   |
| 86 | 89 | Sethi       | MacDonald         | Cancer                                   | 2014 | Second Nonocular Tumors Among Survivors of Retinoblastoma Treated with Contemporary Photon and Proton Radiotherapy                                                                    |
| 87 | 89 | Qaddoumi    | Rodriguez-Galindo | Journal of clinical oncology             | 2012 | Carboplatin-Associated Ototoxicity in Children with Retinoblastoma                                                                                                                    |
| 88 | 89 | Namouni     | Lutz              | European journal of cancer               | 1997 | High-dose Chemotherapy with Carboplatin, Etoposide Andcyclophosphamide Followed by a Haematopoietic Stem Cell Rescue in Patients with High-risk Retinoblastoma: a Sfop and Sfgm Study |
| 89 | 89 | Stannard    | Sevel             | British Journal of Ophthalmology         | 1979 | Retinoblastoma - Correlation of Invasion of the Optic-nerve and Choroid with Prognosis and Metastases                                                                                 |
| 90 | 89 | Sparkes     | Klisak            | Science                                  | 1979 | Retinoblastoma With 13q-chromosomal Deletion Associated with Maternal Paracentric Inversion of 13q                                                                                    |
| 91 | 88 | Uusitalo    | O'Brien           | JAMA ophthalmology                       | 2001 | Evaluation of Chemoprophylaxis in Patients with Unilateral Retinoblastoma with High-risk Features on Histopathologic Examination                                                      |
| 92 | 88 | Schvartzman | Manzitti          | Journal of clinical oncology             | 1996 | Results of a Stage-based Protocol for the Treatment of Retinoblastoma                                                                                                                 |
| 93 | 87 | Moll        | Tan               | International journal of cancer          | 1996 | Second Primary Tumors in Patients with Hereditary Retinoblastoma: A Register-based Follow-up Study, 1945-1994                                                                         |
| 94 | 87 | Doz         | Vielh             | Cancer                                   | 1994 | The Role of Chemotherapy in Orbital Involvement of Retinoblastoma - the Experience of a Single Institution With 33 Patients                                                           |
| 95 | 86 | Yu          | Kleinerma         | Journal of the National Cancer Institute | 2009 | Cause-specific Mortality in Long-term Survivors of Retinoblastoma                                                                                                                     |
| 96 | 86 | DerKindere  | Otter             | International journal of cancer          | 1988 | Non-ocular Cancer in Patients with Hereditary Retinoblastoma and Their Relatives                                                                                                      |
| 97 | 86 | Egbert      | Rosenthal         | JAMA ophthalmology                       | 1978 | Visual Results and Ocular Complications Following Radiotherapy for Retinoblastoma                                                                                                     |
| 98 | 85 | Zhao        | Gallie            |                                          | 2011 | Pre-enucleation Chemotherapy for Eyes Severely Affected by Retinoblastoma Masks Risk of                                                                                               |

|     |    |        |         |                                    |      |                                                                                                                                                     |
|-----|----|--------|---------|------------------------------------|------|-----------------------------------------------------------------------------------------------------------------------------------------------------|
|     |    |        |         | Journal of<br>Clinical<br>Oncology |      | Tumor Extension and Increases<br>Death from Metastasis                                                                                              |
| 99  | 84 | Imhof  | Tan     | Ophthalmology                      | 1996 | Quantification of Orbital and Mid<br>Facial Growth Retardation After<br>Megavoltage External Beam<br>Irradiation in Children with<br>Retinoblastoma |
| 100 | 84 | Wilson | Spencer | Clinical genetics                  | 1977 | Chromosomal-anomalies in Patients<br>with Retinoblastoma                                                                                            |

## References

1. Draper, G.J.; Sanders, B.M.; E Kingston, J. Second primary neoplasms in patients with retinoblastoma. *Br. J. Cancer* **1986**, *53*, 661–671, <https://doi.org/10.1038/bjc.1986.110>.
2. Wong, F.L. Cancer incidence after retinoblastoma. Radiation dose and sarcoma risk. *JAMA* **1997**, *278*, 1262–1267, <https://doi.org/10.1001/jama.278.15.1262>.
3. Yunis, J.J.; Ramsay, N. Retinoblastoma and Subband Deletion of Chromosome 13. *Arch. Pediatr. Adolesc. Med.* **1978**, *132*, 161–163, <https://doi.org/10.1001/archpedi.1978.02120270059012>.
4. Kivelä, T. The epidemiological challenge of the most frequent eye cancer: retinoblastoma, an issue of birth and death. *Br. J. Ophthalmol.* **2009**, *93*, 1129–1131, <https://doi.org/10.1136/bjo.2008.150292>.
5. Abramson, D.H.; Ellsworth, R.M.; Kitchin, F.D.; Tung, G. Second Nonocular Tumors in Retinoblastoma Survivors. *Ophthalmology* **1984**, *91*, 1351–1355, [https://doi.org/10.1016/s0161-6420\(84\)34127-6](https://doi.org/10.1016/s0161-6420(84)34127-6).
6. Linn Murphree, A. Intraocular Retinoblastoma: the Case for a New Group Classification. *Ophthalmol. Clin. N. Am.* **2005**, *18*, 41–53, <https://doi.org/10.1016/j.ohc.2004.11.003>.
7. Shields, C.L.; Mashayekhi, A.; Au, A.K.; Czyz, C.; Leahey, A.; Meadows, A.T.; Shields, J.A. The International Classification of Retinoblastoma Predicts Chemoreduction Success. *Ophthalmology* **2006**, *113*, 2276–2280, <https://doi.org/10.1016/j.ophtha.2006.06.018>.
8. Murphree, A.L.; Villablanca, J.G.; Deegan, W.F.; Sato, J.K.; Malogolowkin, M.; Fisher, A.; Parker, R.; Reed, E.; Gomer, C.J. Chemotherapy Plus Local Treatment in the Management of Intraocular Retinoblastoma. *Arch. Ophthalmol.* **1996**, *114*, 1348–1356, <https://doi.org/10.1001/archopht.1996.01100140548005>.
9. Marees, T.; van Leeuwen, F.; de Boer, M.; Imhof, S.; Ringens, P.; Moll, A. Cancer mortality in long-term survivors of retinoblastoma. *Eur. J. Cancer* **2009**, *45*, 3245–3253, <https://doi.org/10.1016/j.ejca.2009.05.011>.
10. Knudson, A.G.; Hethcote, H.W.; Brown, B.W. Mutation and childhood cancer: a probabilistic model for the incidence of retinoblastoma. *Proc. Natl. Acad. Sci.* **1975**, *72*, 5116–5120, <https://doi.org/10.1073/pnas.72.12.5116>.
11. Knudson, A.G.; Meadows, A.T.; Nichols, W.W.; Hill, R. Chromosomal Deletion and Retinoblastoma. *New Engl. J. Med.* **1976**, *295*, 1120–1123, <https://doi.org/10.1056/nejm197611112952007>.
12. Shields, C.L.; De Potter, P.; Himelstein, B.P.; Shields, J.A.; Meadows, A.T.; Maris, J.M. Chemoreduction in the Initial Management of Intraocular Retinoblastoma. *Arch. Ophthalmol.* **1996**, *114*, 1330–1338, <https://doi.org/10.1001/archopht.1996.01100140530002>.
13. Tombran-Tink, J.; Johnson, L.V. Neuronal differentiation of retinoblastoma cells induced by medium conditioned by human RPE cells. *Investig. Ophthalmology Vis. Sci.* **1989**, *30*.
14. Kingston, J.E. Results of Combined Chemotherapy and Radiotherapy for Advanced Intraocular Retinoblastoma. *Arch. Ophthalmol.* **1996**, *114*, 1339–43, <https://doi.org/10.1001/archopht.1996.01100140539004>.
15. Broadus, E.; Topham, A.; Singh, A.D. Incidence of retinoblastoma in the USA: 1975–2004. *Br. J. Ophthalmol.* **2008**, *93*, 21–23, <https://doi.org/10.1136/bjo.2008.138750>.
16. Abramson, D.H.; Frank, C.M. Second nonocular tumors in survivors of bilateral retinoblastoma: A possible age effect on radiation-related risk. *Ophthalmology* **1998**, *105*, 573–580, [https://doi.org/10.1016/s0161-6420\(98\)94006-4](https://doi.org/10.1016/s0161-6420(98)94006-4).
17. Zampetti-Bosseler, F.; Scott, D. Cell Death, Chromosome Damage and Mitotic Delay in Normal Human, Ataxia Telangiectasia and Retinoblastoma Fibroblasts after X-irradiation. *Int. J. Radiat. Biol. Relat. Stud. Physics, Chem. Med.* **1981**, *39*, 547–558, <https://doi.org/10.1080/09553008114550651>.
18. Jensen, R.D.; Miller, R.W. Retinoblastoma: Epidemiologic Characteristics. *New Engl. J. Med.* **1971**, *285*, 307–311, <https://doi.org/10.1056/nejm197108052850602>.
19. Shields, C.L.; A Shields, J. Retinoblastoma management: advances in enucleation, intravenous chemoreduction, and intra-arterial chemotherapy. *Curr. Opin. Ophthalmol.* **2010**, *21*, 203–212, <https://doi.org/10.1097/ico.0b013e328338676a>.



20. Knudson A.G. Retinoblastoma: a prototypic hereditary neoplasm. *Semin Oncol.* **1978**, 5,57–60. <https://pubmed.ncbi.nlm.nih.gov/635597/>
21. Friedman, D.L.; Himelstein, B.; Shields, C.L.; Shields, J.A.; Needle, M.; Miller, D.; Bunin, G.R.; Meadows, A.T. Chemoreduction and Local Ophthalmic Therapy for Intraocular Retinoblastoma. *J. Clin. Oncol.* **2000**, 18, 12–12, <https://doi.org/10.1200/jco.2000.18.1.12>.
22. McFall, R.C.; Sery, T.W.; Makadon, M. Characterization of a new continuous cell line derived from a human retinoblastoma. *Cancer Res* **1977**, 37.
23. Yamane, T.; Kaneko, A.; Mohri, M. The technique of ophthalmic arterial infusion therapy for patients with intraocular retinoblastoma. *Int. J. Clin. Oncol.* **2004**, 9, 69–73, <https://doi.org/10.1007/s10147-004-0392-6>.
24. Khelifaoui F, Validire P, Auperin A, et al. Histopathologic risk factors in retinoblastoma: a retrospective study of 172 patients treated in a single institution. *Cancer.* **1996**,77:1206–1213. <https://pubmed.ncbi.nlm.nih.gov/8635145/>
25. Lee, C.T.; Bilton, S.D.; Famiglietti, R.M.; Riley, B.A.; Mahajan, A.; Chang, E.L.; Maor, M.H.; Woo, S.Y.; Cox, J.D.; Smith, A.R. Treatment planning with protons for pediatric retinoblastoma, medulloblastoma, and pelvic sarcoma: How do protons compare with other conformal techniques?. *Int. J. Radiat. Oncol.* **2005**, 63, 362–372, <https://doi.org/10.1016/j.ijrobp.2005.01.060>.
26. The American Brachytherapy Society - Ophthalmic Oncology Task Force. The American Brachytherapy Society consensus guidelines for plaque brachytherapy of uveal melanoma and retinoblastoma. *Brachytherapy* **2014**, 13, 1–14, doi:10.1016/j.brachy.2013.11.008.
27. Shields C.L., Shields J.A., Baez K., et al. Optic nerve invasion of retinoblastoma. Metastatic potential and clinical risk factors. *Cancer.* **1994**,3, 692–698. <https://pubmed.ncbi.nlm.nih.gov/8299091/>
28. Honavar, S.; Singh, A.D.; Shields, C.L.; Meadows, A.T.; Demirci, H.; Cater, J.; Shields, J.A. Postenucleation Adjuvant Therapy in High-Risk Retinoblastoma. *Arch. Ophthalmol.* **2002**, 120, 923–931, <https://doi.org/10.1001/archophth.120.7.923>.
29. Shields, C.L.; Shields, J.A.; Baez, K.A.; Cater, J.; De Potter, P.V. Choroidal invasion of retinoblastoma: metastatic potential and clinical risk factors. *Br. J. Ophthalmol.* **1993**, 77, 544–548, <https://doi.org/10.1136/bjo.77.9.544>.
30. Shields, C.L.; Honavar, S.G.; Meadows, A.T.; A Shields, J.; Demirci, H.; Singh, A.; Friedman, D.L.; Naduvilath, T.J. Chemoreduction plus focal therapy for retinoblastoma: factors predictive of need for treatment with external beam radiotherapy or enucleation. *Am. J. Ophthalmol.* **2002**, 133, 657–664, [https://doi.org/10.1016/s0002-9394\(02\)01348-x](https://doi.org/10.1016/s0002-9394(02)01348-x).
31. Kivelä, T. Trilateral Retinoblastoma: A Meta-Analysis of Hereditary Retinoblastoma Associated With Primary Ectopic Intracranial Retinoblastoma. *J. Clin. Oncol.* **1999**, 17, 1829–1829, <https://doi.org/10.1200/jco.1999.17.6.1829>.
32. Abramson, D.H.; Frank, C.M.; Dunkel, I.J. A phase I/II study of subconjunctival carboplatin for intraocular retinoblastoma. *Ophthalmology* **1999**, 106, 1947–1950, [https://doi.org/10.1016/s0161-6420\(99\)90406-2](https://doi.org/10.1016/s0161-6420(99)90406-2).
33. Kopelman, J.E.; McLean, I.W.; Rosenberg, S.H. Multivariate Analysis of Risk Factors for Metastasis in Retinoblastoma Treated by Enucleation. *Ophthalmology* **1987**, 94, 371–377, [https://doi.org/10.1016/s0161-6420\(87\)33436-0](https://doi.org/10.1016/s0161-6420(87)33436-0).
34. Chintagumpala, M.; Chevez-Barrios, P.; Paysse, E.A.; Plon, S.E.; Hurwitz, R. Retinoblastoma: Review of Current Management. *Oncol.* **2007**, 12, 1237–1246, <https://doi.org/10.1634/theoncologist.12-10-1237>.
35. Gombos, D.S.; Hungerford, J.; Abramson, D.H.; Kingston, J.; Chantada, G.; Dunkel, I.J.; Antoneli, C.B.; Greenwald, M.; Haik, B.G.; Leal, C.A.; et al. Secondary Acute Myelogenous Leukemia in Patients with Retinoblastoma: Is Chemotherapy a Factor?. *Ophthalmology* **2007**, 114, 1378–1383, <https://doi.org/10.1016/j.ophtha.2007.03.074>.
36. Abramson, D.H.; Frank, C.M.; Susman, M.; Whalen, M.P.; Dunkel, I.J.; Boyd, N.W. Presenting signs of retinoblastoma. *J. Pediatr.* **1998**, 132, 505–508, [https://doi.org/10.1016/s0022-3476\(98\)70028-9](https://doi.org/10.1016/s0022-3476(98)70028-9).
37. Shields, C.L.; Shields, J.A. Basic understanding of current classification and management of retinoblastoma. *Curr. Opin. Ophthalmol.* **2006**, 17, 228–234, <https://doi.org/10.1097/01.icu.0000193079.55240.18>.
38. Abramson, D.H.; Shields, C.L.; Munier, F.L.; Chantada, G.L. Treatment of Retinoblastoma in 2015. *JAMA Ophthalmol* **2015**, 133, 1341–1347, <https://doi.org/10.1001/jamaophthalmol.2015.3108>.
39. Chantada, G.; Doz, F.; Antoneli, C.B.; Grundy, R.; Stannard, F.C.; Dunkel, I.J.; Grabowski, E.; Leal-Leal, C.; Rodríguez-Galindo, C.; Schwartzman, E.; et al. A proposal for an international retinoblastoma staging system. *Pediatr. Blood Cancer* **2005**, 47, 801–805, <https://doi.org/10.1002/pbc.20606>.
40. Shields, C.L.; Shields, J.A.; Needle, M.; De Potter, P.; Kheterpal, S.; Hamada, A.; Meadows, A.T. Combined chemoreduction and adjuvant treatment for intraocular retinoblastoma. *Ophthalmology* **1997**, 104, 2101–2111, [https://doi.org/10.1016/s0161-6420\(97\)30053-0](https://doi.org/10.1016/s0161-6420(97)30053-0).

41. Sastre, X.; Chantada, G.L.; Doz, F.; Wilson, M.W.; de Davila, M.T.G.; Rodríguez-Galindo, C.; Chintagumpala, M.; Chévez-Barrios, P. Proceedings of the Consensus Meetings From the International Retinoblastoma Staging Working Group on the Pathology Guidelines for the Examination of Enucleated Eyes and Evaluation of Prognostic Risk Factors in Retinoblastoma. *Arch. Pathol. Lab. Med.* **2009**, *133*, 1199–1202, <https://doi.org/10.5858/133.8.1199>.
42. Sanders, B.M.; Draper, G.J.; Kingston, J.E. Retinoblastoma in Great Britain 1969–80: Incidence, treatment, and survival. *Br. J. Ophthalmol.* **1988**, *72*, 576–583, <https://doi.org/10.1136/bjo.72.8.576>.
43. Lalande, M.; Dryja, T.P.; Schreck, R.R.; Shipley, J.; Flint, A.; Latt, S.A. Isolation of human chromosome 13-specific DNA sequences cloned from flow sorted chromosomes and potentially linked to the retinoblastoma locus. *Cancer Genet. Cytogenet.* **1984**, *13*, 283–295, [https://doi.org/10.1016/0165-4608\(84\)90073-6](https://doi.org/10.1016/0165-4608(84)90073-6).
44. Tamboli, A. The Incidence of Retinoblastoma in the United States: 1974 Through 1985. *Arch. Ophthalmol.* **1990**, *108*, 128–32, <https://doi.org/10.1001/archophth.1990.01070030134045>.
45. Hethcote, H.W.; Knudson, A.G. Model for the incidence of embryonal cancers: application to retinoblastoma. *Proc. Natl. Acad. Sci.* **1978**, *75*, 2453–2457, <https://doi.org/10.1073/pnas.75.5.2453>.
46. Broadus, E.; Topham, A.; Singh, A.D. Survival with retinoblastoma in the USA: 1975–2004. *Br. J. Ophthalmol.* **2008**, *93*, 24–27, <https://doi.org/10.1136/bjo.2008.143842>.
47. Draper, G.J.; Sanders, B.M.; Brownbill, P.A.; Hawkins, M.M. Patterns of risk of hereditary retinoblastoma and applications to genetic counselling. *Br. J. Cancer* **1992**, *66*, 211–219, <https://doi.org/10.1038/bjc.1992.244>.
48. Canturk, S.; Qaddoumi, I.; Khetan, V.; Ma, Z.; Furmanchuk, A.; Antoneli, C.B.G.; Sultan, I.; Kebudi, R.; Sharma, T.; Rodríguez-Galindo, C.; et al. Survival of retinoblastoma in less-developed countries impact of socioeconomic and health-related indicators. *Br. J. Ophthalmol.* **2010**, *94*, 1432–1436, <https://doi.org/10.1136/bjo.2009.168062>.
49. Ts'O, M.O.; Fine, B.S.; Zimmerman, L.E. The Nature of Retinoblastoma. II. Photoreceptor Differentiation: An Electron Microscopic Study. *Am. J. Ophthalmol.* **1970**, *69*, 350–359, [https://doi.org/10.1016/0002-9394\(70\)92264-6](https://doi.org/10.1016/0002-9394(70)92264-6).
50. Abramson D.H., Ellsworth R.M., Zimmerman L.E. Nonocular cancer in retinoblastoma survivors. *Trans Sect Ophthalmol Am Acad Ophthalmol Otolaryngol.* **1976** ;81:454–457. <https://DOI.org/10.1002/cncr.28387>
51. Rodríguez-Galindo, C.; Wilson, M.W.; Haik, B.G.; Merchant, T.E.; Billups, C.A.; Shah, N.; Cain, A.; Langston, J.; Lipson, M.; Kun, L.E.; et al. Treatment of Intraocular Retinoblastoma With Vincristine and Carboplatin. *J. Clin. Oncol.* **2003**, *21*, 2019–2025, <https://doi.org/10.1200/jco.2003.09.103>.
52. Moll, A.C.; Imhof, S.M.; Meeteren, A.Y.S.-V.; Kuik, D.J.; Hofman, P.; Boers, M. Second primary tumors in hereditary retinoblastoma: a register-based study, 1945–1997: Is there an age effect on radiation-related risk?. *Ophthalmology* **2001**, *108*, 1109–1114, [https://doi.org/10.1016/s0161-6420\(01\)00562-0](https://doi.org/10.1016/s0161-6420(01)00562-0).
53. Shields, C.L.; Bianciotto, C.G.; Jabbour, P.; Griffin, G.C.; Ramasubramanian, A.; Rosenwasser, R.; Shields, J.A. Intra-arterial Chemotherapy for Retinoblastoma. *JAMA Ophthalmol* **2011**, *129*, 1407–1415, <https://doi.org/10.1001/archophth.2011.151>.
54. Pendergrass, T.W.; Davis, S. Incidence of Retinoblastoma in the United States. *Arch. Ophthalmol.* **1980**, *98*, 1204–1210, <https://doi.org/10.1001/archophth.1980.01020040056003>.
55. Ts'O, M.O.; Zimmerman, L.E.; Fine, B.S. The Nature of Retinoblastoma. I. Photoreceptor Differentiation: A Clinical and Histopathologic Study. *Am. J. Ophthalmol.* **1970**, *69*, 339–349, [https://doi.org/10.1016/0002-9394\(70\)92263-4](https://doi.org/10.1016/0002-9394(70)92263-4).
56. Chantada, G.; Fandiño, A.; Manzitti, J.; Urrutia, L.; Schwartzman, E. Late diagnosis of retinoblastoma in a developing country. *Arch. Dis. Child.* **1999**, *80*, 171–174, <https://doi.org/10.1136/adc.80.2.171>.
57. Shields, C.L. Plaque radiotherapy for retinoblastoma Long-term tumor control and treatment complications in 208 tumors. *Ophthalmology* **2001**, *108*, 2116–2121, [https://doi.org/10.1016/s0161-6420\(01\)00797-7](https://doi.org/10.1016/s0161-6420(01)00797-7).
58. Kaliki, S.; Shields, C.L.; Rojanaporn, D.; Al-Dahmash, S.; McLaughlin, J.P.; Shields, J.A.; Eagle, R.C. High-Risk Retinoblastoma Based on International Classification of Retinoblastoma: Analysis of 519 Enucleated Eyes. *Ophthalmology* **2013**, *120*, 997–1003, <https://doi.org/10.1016/j.ophtha.2012.10.044>.
59. Abramson, D.H.; Beaverson, K.; Sangani, P.; Vora, R.A.; Lee, T.C.; Hochberg, H.M.; Kirsztrot, J.; Ranjithan, M. Screening for Retinoblastoma: Presenting Signs as Prognosticators of Patient and Ocular Survival. *Pediatrics* **2003**, *112*, 1248–1255, <https://doi.org/10.1542/peds.112.6.1248>.

60. Abramson, D.H.; Ronner, H.J.; Ellsworth, R.M. Second Tumors in Nonirradiated Bilateral Retinoblastoma. *Am. J. Ophthalmol.* **1979**, *87*, 624–627, [https://doi.org/10.1016/0002-9394\(79\)90293-9](https://doi.org/10.1016/0002-9394(79)90293-9).
61. Shields, C.L.; Fulco, E.M.; Arias, J.D.; Alarcon, C.; Pellegrini, M.; Rishi, P.; Kaliki, S.; Bianciotto, C.G.; A Shields, J. Retinoblastoma frontiers with intravenous, intra-arterial, periocular, and intravitreal chemotherapy. *Eye* **2012**, *27*, 253–264, <https://doi.org/10.1038/eye.2012.175>.
62. Shields, C.L. Factors Predictive of Recurrence of Retinal Tumors, Vitreous Seeds, and Subretinal Seeds Following Chemoreduction for Retinoblastoma. *Arch. Ophthalmol.* **2002**, *120*, <https://doi.org/10.1001/archophth.120.4.460>.
63. Messmer, E.P.; Heinrich, T.; Höpping, W.; de Sutter, E.; Havers, W.; Sauerwein, W. Risk Factors for Metastases in Patients with Retinoblastoma. *Ophthalmology* **1991**, *98*, 136–141, [https://doi.org/10.1016/s0161-6420\(91\)32325-x](https://doi.org/10.1016/s0161-6420(91)32325-x).
64. Moll, A.C.; Kuik, D.J.; Bouter, L.; Otter, W.D.; Bezemer, P.D.; Koten, J.W.; Imhof, S.M.; Kuyt, B.P.; Tan, K.E.W.P. Incidence and survival of retinoblastoma in the Netherlands: a register based study 1862–1995. *Br. J. Ophthalmol.* **1997**, *81*, 559–562, <https://doi.org/10.1136/bjo.81.7.559>.
65. Nagasawa, H.; Little, J.B. Comparison of kinetics of X-ray-induced cell killing in normal, ataxia telangiectasia and hereditary retinoblastoma fibroblasts. *Mutat. Res. Mol. Mech. Mutagen.* **1983**, *109*, 297–308, [https://doi.org/10.1016/0027-5107\(83\)90054-4](https://doi.org/10.1016/0027-5107(83)90054-4).
66. Devesa, S.S. The Incidence of Retinoblastoma. *Am. J. Ophthalmol.* **1975**, *80*, 263–265, [https://doi.org/10.1016/0002-9394\(75\)90143-9](https://doi.org/10.1016/0002-9394(75)90143-9).
67. Jakobiec, F.A.; Tso, M.O.M.; Zimmerman, L.E.; Danis, P. Retinoblastoma and intracranial malignancy. *Cancer* **1977**, *39*, 2048–2058, [https://doi.org/10.1002/1097-0142\(197705\)39:5<2048::aid-cnrcr2820390522>3.0.co;2-9](https://doi.org/10.1002/1097-0142(197705)39:5<2048::aid-cnrcr2820390522>3.0.co;2-9).
68. Shields, C.L.; A Shields, J. Recent Developments in the Management of Retinoblastoma. *J. Pediatr. Ophthalmol. Strabismus* **1999**, *36*, 8–9, <https://doi.org/10.3928/0191-3913-19990101-04>.
69. Leander, C.; Fu, L.C.; Peña, A.; Howard, S.C.; Rodriguez-Galindo, C.; Wilimas, J.A.; Ribeiro, R.C.; Haik, B. Impact of an education program on late diagnosis of retinoblastoma in Honduras. *Pediatr. Blood Cancer* **2006**, *49*, 817–819, <https://doi.org/10.1002/pbc.21052>.
70. Shields, C.L.; Santos, M.C.M.; Diniz, W.; Gündüz, K.; Mercado, G.; Cater, J.R.; Shields, J.A. Thermotherapy for Retinoblastoma. *Arch. Ophthalmol.* **1999**, *117*, 885–893, <https://doi.org/10.1001/archophth.117.7.885>.
71. Squire, J.; Gallie, B.; Phillips, R.A. A detailed analysis of chromosomal changes in heritable and non-heritable retinoblastoma. *Hum. Genet.* **1985**, *70*, 291–301, <https://doi.org/10.1007/bf00295364>.
72. Benedict, W.F.; Banerjee, A.; Mark, C.; Murphree, A. Nonrandom chromosomal changes in untreated retinoblastomas. *Cancer Genet. Cytogenet.* **1983**, *10*, 311–333, [https://doi.org/10.1016/0165-4608\(83\)90090-0](https://doi.org/10.1016/0165-4608(83)90090-0).
73. de Graaf, P.; on behalf of the European Retinoblastoma Imaging Collaboration (ERIC); Görcke, S.; Rodjan, F.; Galluzzi, P.; Maeder, P.; Castelijns, J.A.; Brisse, H.J. Guidelines for imaging retinoblastoma: imaging principles and MRI standardization. *Pediatr. Radiol.* **2011**, *42*, 2–14, <https://doi.org/10.1007/s00247-011-2201-5>.
74. Jr, R.C.E. High-Risk Features and Tumor Differentiation in Retinoblastoma: A Retrospective Histopathologic Study. *Arch. Pathol. Lab. Med.* **2009**, *133*, 1203–1209, <https://doi.org/10.5858/133.8.1203>.
75. Magrann, I.; Abramson, D.H.; Ellsworth, R.M. Optic Nerve Involvement in Retinoblastoma. *Ophthalmology* **1989**, *96*, 217–222, [https://doi.org/10.1016/s0161-6420\(89\)32910-1](https://doi.org/10.1016/s0161-6420(89)32910-1).
76. Shields, C.L.; Lally, S.E.; Leahey, A.M.; Jabbour, P.M.; Caywood, E.H.; Schwendeman, R.; Shields, J.A. Targeted retinoblastoma management. *Curr. Opin. Ophthalmol.* **2014**, *25*, 374–385, <https://doi.org/10.1097/ico.0000000000000091>.
77. Wilson M.G., Towner J.W., Fujimoto A. Retinoblastoma and D-chromosome deletions. *Am J Hum Genet.* **1973**, *1*:57–61. <https://pubmed.ncbi.nlm.nih.gov/4119334/>
78. Lennox, E.L.; Draper, G.J.; Sanders, B.M. Retinoblastoma: a study of natural history and prognosis of 268 cases. *BMJ* **1975**, *3*, 731–734, <https://doi.org/10.1136/bmj.3.5986.731>.
79. Abramson, D.H. Retinoblastoma in the 20th Century: Past Success and Future Challenges The Weisenfeld Lecture. *Investig. Ophthalmology Vis. Sci.* **2005**, *46*, 2684–2691, <https://doi.org/10.1167/iovs.04-1462>.
80. Chantada, G.L.; Dunkel, I.J.; de Dávila, M.T.G.; Abramson, D.H. Retinoblastoma patients with high risk ocular pathological features: who needs adjuvant therapy?. *Br. J. Ophthalmol.* **2004**, *88*, 1069–1073, <https://doi.org/10.1136/bjo.2003.037044>.
81. Abramson, D.H.; Marr, B.P.; Dunkel, I.; Brodie, S.; Zabor, E.C.; Driscoll, S.J.; Gobin, Y.P. Intra-arterial chemotherapy for retinoblastoma in eyes with vitreous and/or subretinal seeding: 2-year results. *Br. J. Ophthalmol.* **2011**, *96*, 499–502, <https://doi.org/10.1136/bjophthalmol-2011-300498>.
82. Weichselbaum, R.R.; Nove, J.; Little, J.B. X-ray sensitivity of diploid fibroblasts from patients with hereditary or sporadic retinoblastoma. *Proc. Natl. Acad. Sci.* **1978**, *75*, 3962–3964, <https://doi.org/10.1073/pnas.75.8.3962>.

83. Shields, J.A.; Augsburger, J.J. Current approaches to the diagnosis and management of retinoblastoma. *Surv. Ophthalmol.* **1981**, *25*, 347–372, [https://doi.org/10.1016/0039-6257\(81\)90072-2](https://doi.org/10.1016/0039-6257(81)90072-2).
84. Beck, M.N.; Balmer, A.; Dessing, C.; Pica, A.; Munier, F. First-Line Chemotherapy With Local Treatment Can Prevent External-Beam Irradiation and Enucleation in Low-Stage Intraocular Retinoblastoma. *J. Clin. Oncol.* **2000**, *18*, 2881–2887, <https://doi.org/10.1200/jco.2000.18.15.2881>.
85. A Bedford, M.; Bedotto, C.; A Macfaul, P. Retinoblastoma. A study of 139 cases. *Br. J. Ophthalmol.* **1971**, *55*, 19–27, <https://doi.org/10.1136/bjo.55.1.19>.
86. Sethi R.V., Shih H.A., Yeap B.Y., et al. Second nonocular tumors among survivors of retinoblastoma treated with contemporary photon and proton radiotherapy. *Cancer.* **2014**, *1*, 126–133. DOI: 10.1002/cncr.28387.
87. Qaddoumi, I.; Bass, J.; Wu, J.; Billups, C.A.; Wozniak, A.W.; Merchant, T.E.; Haik, B.G.; Wilson, M.W.; Rodriguez-Galindo, C. Carboplatin-Associated Ototoxicity in Children With Retinoblastoma. *J. Clin. Oncol.* **2012**, *30*, 1034–1041, <https://doi.org/10.1200/jco.2011.36.9744>.
88. Namouni, F.; Doz, F.; Tanguy, M.; Quintana, E.; Michon, J.; Pacquement, H.; Bouffet, E.; Gentet, J.; Plantaz, D.; Lutz, P.; et al. High-dose chemotherapy with carboplatin, etoposide and cyclophosphamide followed by a haematopoietic stem cell rescue in patients with high-risk retinoblastoma: a SFOP and SFGM study. *Eur. J. Cancer* **1997**, *33*, 2368–2375, [https://doi.org/10.1016/s0959-8049\(97\)10019-3](https://doi.org/10.1016/s0959-8049(97)10019-3).
89. Stannard, C.; Lipper, S.; Sealy, R.; Sevel, D. Retinoblastoma: correlation of invasion of the optic nerve and choroid with prognosis and metastases. *Br. J. Ophthalmol.* **1979**, *63*, 560–570, <https://doi.org/10.1136/bjo.63.8.560>.
90. Sparkes, R.S.; Muller, H.; Klisak, I.; Abram, J.A. Retinoblastoma with 13q- Chromosomal Deletion Associated with Maternal Paracentric Inversion of 13q. *Science* **1979**, *203*, 1027–1029, <https://doi.org/10.1126/science.424728>.
91. Uusitalo, M.S.; Van Quill, K.R.; Scott, I.U.; Matthay, K.K.; Murray, T.G.; O'Brien, J.M. Evaluation of chemoprophylaxis in patients with unilateral retinoblastoma with high-risk features on histopathologic examination. *Arch. Ophthalmol.* **2001**, *119*.
92. Schwartzman, E.; Chantada, G.; Fandiño, A.; De Dávila, M.T.; Raslawski, E.; Manzitti, J. Results of a stage-based protocol for the treatment of retinoblastoma. *J. Clin. Oncol.* **1996**, *14*, 1532–1536, <https://doi.org/10.1200/jco.1996.14.5.1532>.
93. Moll A.C., Imhof S.M., Bouter .LM, et al. Second primary tumors in patients with hereditary retinoblastoma: a register-based follow-up study, 1945–1994. *Int J Cancer.* **1996** *4*, 515–519. DOI: 10.1002/(SICI)1097-0215(19960807)67:4<515::AID-IJC9>3.0.CO;2-V.
94. Doz, F.; Khelfaoui, F.; Mosseri, V.; Validire, P.; Quintana, E.; Michon, J.; M.D., L.D.; Schlienger, P.; M.D., S.N.; Vielh, P.; et al. The role of chemotherapy in orbital involvement of retinoblastoma. The experience of a single institution with 33 patients. *Cancer* **1994**, *74*, 722–732, [https://doi.org/10.1002/1097-0142\(19940715\)74:2<722::aid-cncr2820740228>3.0.co;2-h](https://doi.org/10.1002/1097-0142(19940715)74:2<722::aid-cncr2820740228>3.0.co;2-h).
95. Yu, C.-L.; Tucker, M.A.; Abramson, D.H.; Furukawa, K.; Seddon, J.M.; Stovall, M.; Fraumeni, J.F.; Kleinerman, R. Cause-Specific Mortality in Long-Term Survivors of Retinoblastoma. *Gynecol. Oncol.* **2009**, *101*, 581–591, <https://doi.org/10.1093/jnci/djp046>.
96. Derkinderen, D.J.; Koten, J.W.; Nagelkerke, N.J.D.; Tan, K.E.W.P.; Beemer, F.A.; Otter, W.D. Non-ocular cancer in patients with hereditary retinoblastoma and their relatives. *Int. J. Cancer* **1988**, *41*, 499–504, <https://doi.org/10.1002/ijc.2910410405>.
97. Egbert, P.R.; Donaldson, S.S.; Moazed, K.; Rosenthal, A.R. Visual Results and Ocular Complications Following Radiotherapy for Retinoblastoma. *Arch. Ophthalmol.* **1978**, *96*, 1826–1830, <https://doi.org/10.1001/archophth.1978.03910060338008>.
98. Zhao, J.; Dimaras, H.; Massey, C.; Xu, X.; Huang, D.; Li, B.; Chan, H.S.; Gallie, B.L. Pre-Enucleation Chemotherapy for Eyes Severely Affected by Retinoblastoma Masks Risk of Tumor Extension and Increases Death From Metastasis. *J. Clin. Oncol.* **2011**, *29*, 845–851, <https://doi.org/10.1200/jco.2010.32.5332>.
100. Imhof, S.M.; Mourits, M.P.; Hofman, P.; Zonneveld, F.W.; Schipper, J.; Moll, A.C.; Tan, K.E. Quantification of Orbital and Mid-facial Growth Retardation after Megavoltage External Beam Irradiation in Children with Retinoblastoma. *Ophthalmology* **1996**, *103*, 263–268, [https://doi.org/10.1016/s0161-6420\(96\)30706-9](https://doi.org/10.1016/s0161-6420(96)30706-9).
101. Wilson, M.G.; Ebbin, A.J.; Towner, J.W.; Spencer, W.H. Chromosomal anomalies in patients with retinoblastoma. *Clin. Genet.* **2008**, *12*, 1–8, <https://doi.org/10.1111/j.1399-0004.1977.tb00894.x>.
